# Supplementary material
Source: Royal Society of Chemistry journal article supplement (doi:10.1039/d6ay00388e)
Supplement: d6ay00388e1.pdf [file d6ay00388e1.pdf]

## Supplementary Information

### **A dual mode turn-on probe for H<sub>2</sub>O<sub>2</sub> sensing via fluorescence and colorimetry in live cells and serum**

Weitian Chen <sup>a,b,1</sup>, Hui Dong <sup>b,\*1</sup>, Siyu Wang <sup>b</sup>, Yitong Jiang <sup>b</sup>, Yujia Qian <sup>b</sup>, Aixin Chang <sup>b</sup>, Jiahui Ding <sup>b</sup>, Xue Yang <sup>b</sup>, Yanli Zhou <sup>b</sup>, Yintang Zhang <sup>a,b,c</sup>, Zhaohui Li <sup>a</sup>, Maotian Xu <sup>a,b</sup>

<sup>a</sup> *College of Chemistry, Zhengzhou University, Zhengzhou 450001, China*

<sup>b</sup> *Henan Key Laboratory of Biomarker Detection and Diagnosis for Neurodegenerative Diseases, Henan Joint International Research Laboratory of Chemo/Biosensing and Early Diagnosis of Major Diseases, College of Chemistry and Chemical Engineering, Shangqiu Normal University, Shangqiu 476000, China*

<sup>c</sup> *School of Chemistry & Materials Engineering, Xinxiang University, Xinxiang 453000, China*

*\* Corresponding authors.*

*E-mail addresses: [huidong607607@126.com](mailto:huidong607607@126.com)*

<sup>1</sup> *Hui Dong and Weitian Chen contributed equally to this work.*

## Table of contents

|                                                                                                                          |    |
|--------------------------------------------------------------------------------------------------------------------------|----|
| 1. Instruments.....                                                                                                      | 3  |
| 2. Samples Preparation.....                                                                                              | 4  |
| 3. TLC and <sup>1</sup> H NMR, <sup>13</sup> C NMR, <sup>19</sup> F NMR of Re-FS.....                                    | 5  |
| 4. Mass spectra of Re-FS.....                                                                                            | 8  |
| 5. Mass spectra of Re-FS with H <sub>2</sub> O <sub>2</sub> .....                                                        | 8  |
| 6. HPLC.....                                                                                                             | 9  |
| 7. FTIR.....                                                                                                             | 10 |
| 8. Reaction temperature.....                                                                                             | 11 |
| 9. Selectivity and competition tests.....                                                                                | 12 |
| 10. Cell experiments.....                                                                                                | 13 |
| Table S1. Comparison of different H <sub>2</sub> O <sub>2</sub> sensing systems.....                                     | 15 |
| Table S2. Fluorescence, colorimetric, and RGB method linear fitting.....                                                 | 16 |
| Table S3. Detection of H <sub>2</sub> O <sub>2</sub> in serum samples from normal human by Fluorescence (n=3).....       | 16 |
| Table S4. Detection of H <sub>2</sub> O <sub>2</sub> in serum samples from normal human by UV-Vis (n=3).....             | 17 |
| Table S5. Detection of H <sub>2</sub> O <sub>2</sub> in human serum by smartphone-based RGB extraction method (n=3)..... | 18 |

## 1. Instruments.

$^1\text{H}$  NMR,  $^{13}\text{C}$  NMR and  $^{19}\text{F}$  NMR spectra were taken on a 400 MHz NMR spectrometer (Bruker, Karlsruhe, Germany) using  $\text{CDCl}_3$  as solvent, and chemical shifts were reported in parts per million (ppm) downfield relative to tetramethylsilane (TMS,  $\delta$  scale with solvent resonances as internal standards). High-resolution mass spectra (HR-MS) were obtained on Bruker solanX 70 FT-MS; Agilent 6540 TOF. mass spectrometer with negative ion mode using methanol and water (v/v = 1:1) as solvent. High-performance liquid chromatography (HPLC) measurements were conducted on Agilent Technologies 1260 Infinity II (column: Agilent SB-C18, 5  $\mu\text{m}$ , 4.6  $\times$  150 mm). Fourier transform infrared (FT-IR) spectra were recorded on a Nicolet iS 10 Fourier spectrophotometer (Thermo Electron, Waltham, MA, USA). Optical spectroscopy of absorption spectra and fluorescence spectra was carried out on a Lambda 565 UV-Vis spectrophotometer (PerkinElmer, USA) and LS55 fluorescence spectrophotometer (PerkinElmer, USA), respectively, in a 1 cm  $\times$  0.2 cm cuvette. Fluorescence imaging was performed on a Leica TCS SP8 STED super-resolution confocal system and a Leica TCS SP8 X white light laser scanning confocal microscope system. All pH measurements were performed using a pH-3C digital pH meter (Shanghai Lei Ci Device Works, Shanghai, China).

## **2. Samples Preparation.**

### **Preparation of human serum.**

Human blood samples (obtained from Shangqiu First People's Hospital) were centrifuged at 7000g and 4 °C for 5 min. The serum was diluted 100-fold with PBS (0.1 M, pH 7.4) and added to 0.5 mL test tubes. Diluted serum samples spiked with different concentrations of H<sub>2</sub>O<sub>2</sub> were mixed with 10 μM Re-FS and incubated at 37 °C for 60 min prior to spectral analysis. All procedures involving animals were conducted with the approval of the Animal Ethics Committee of Shangqiu Normal University, China.

### **Preparation of cell.**

HeLa cells were cultured in Dulbecco's Modified Eagle Medium (DMEM) supplemented with 10% fetal bovine serum and 1% antibiotics (100.0 U/mL penicillin and 100.0 μg/mL streptomycin) at 37 °C under a 5% CO<sub>2</sub> atmosphere to maintain stable growth. The cells were then seeded into culture flasks containing 5 mL of medium and incubated at 37 °C with 5% CO<sub>2</sub>. Once the cells reached approximately 80% confluence, subculture was performed. Finally, well-shaped cells were seeded into confocal dishes containing 1 mL of medium and cultured for 24 h for subsequent cell imaging experiments.

### 3. TLC and <sup>1</sup>H NMR, <sup>13</sup>C NMR, <sup>19</sup>F NMR of Re-FS.

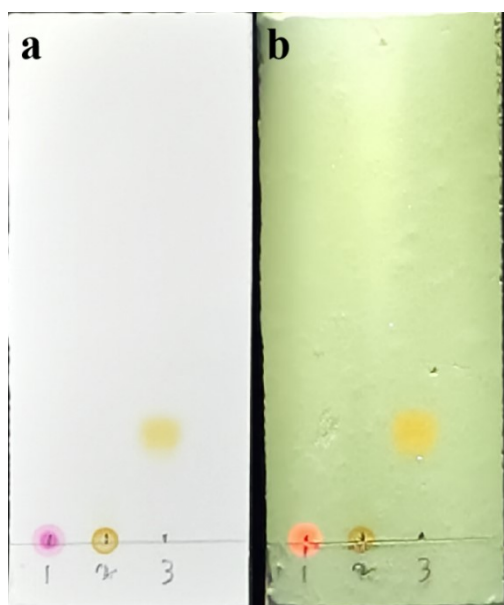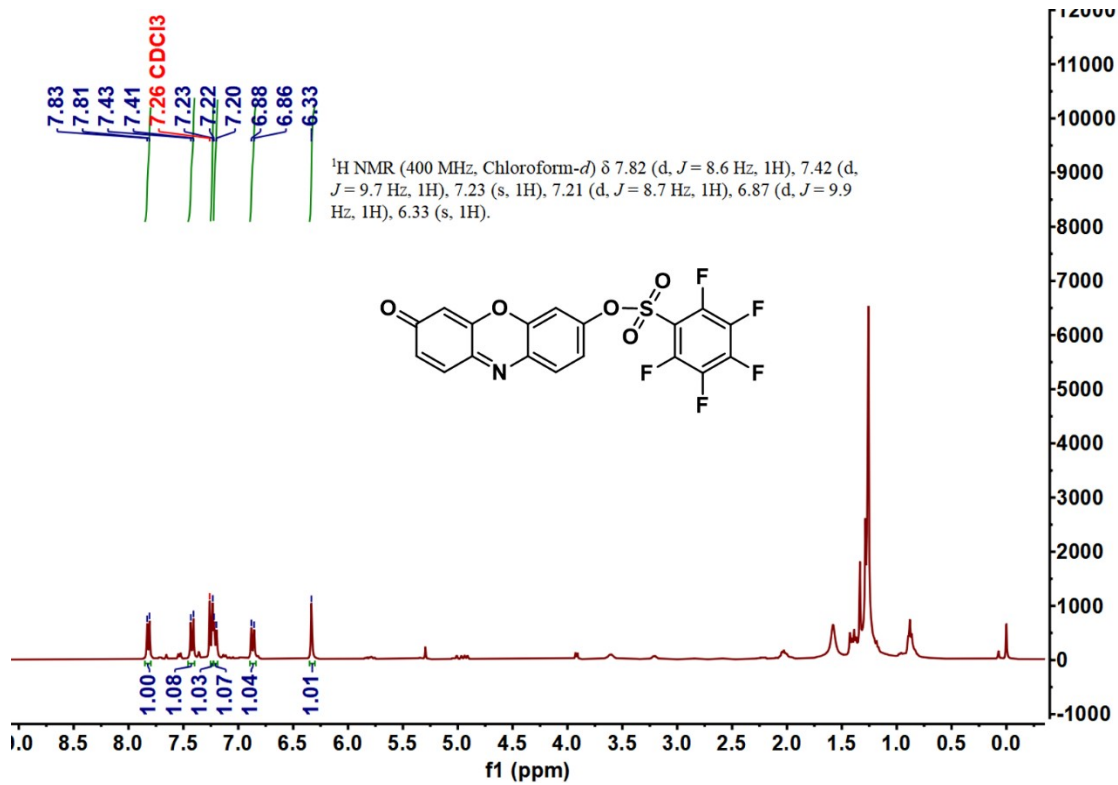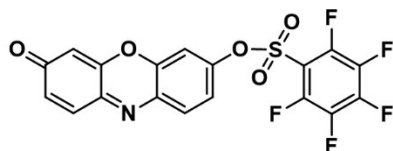

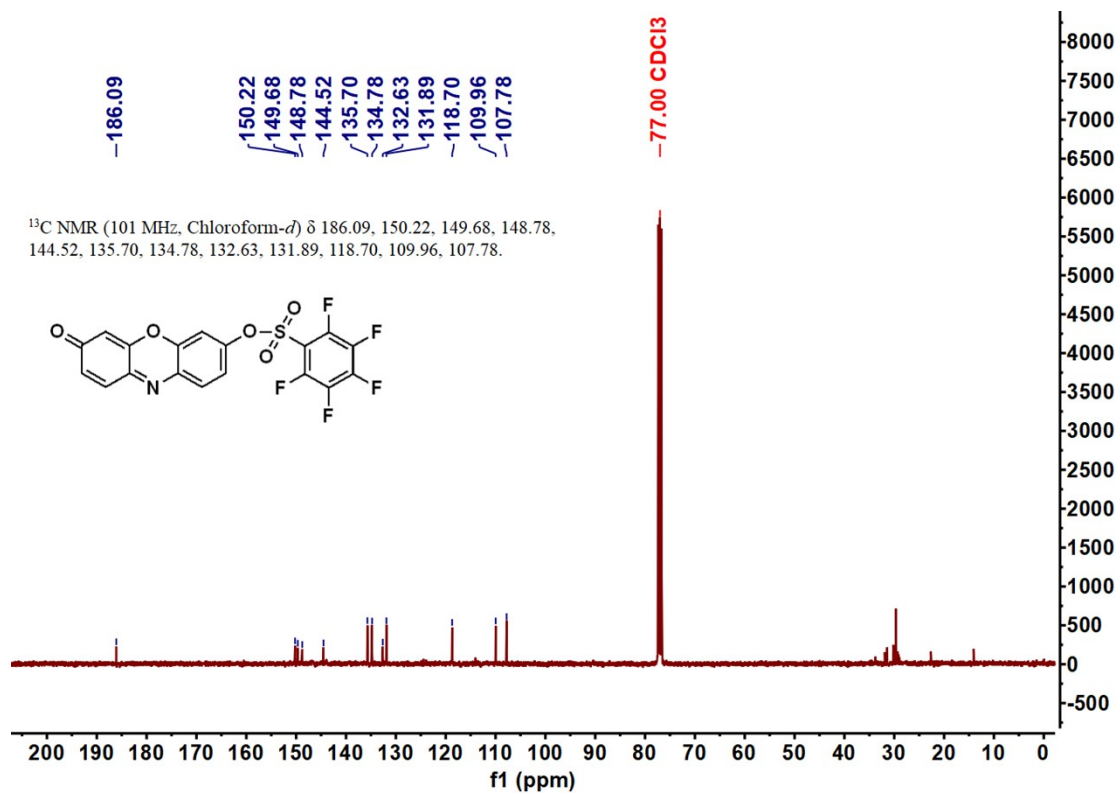

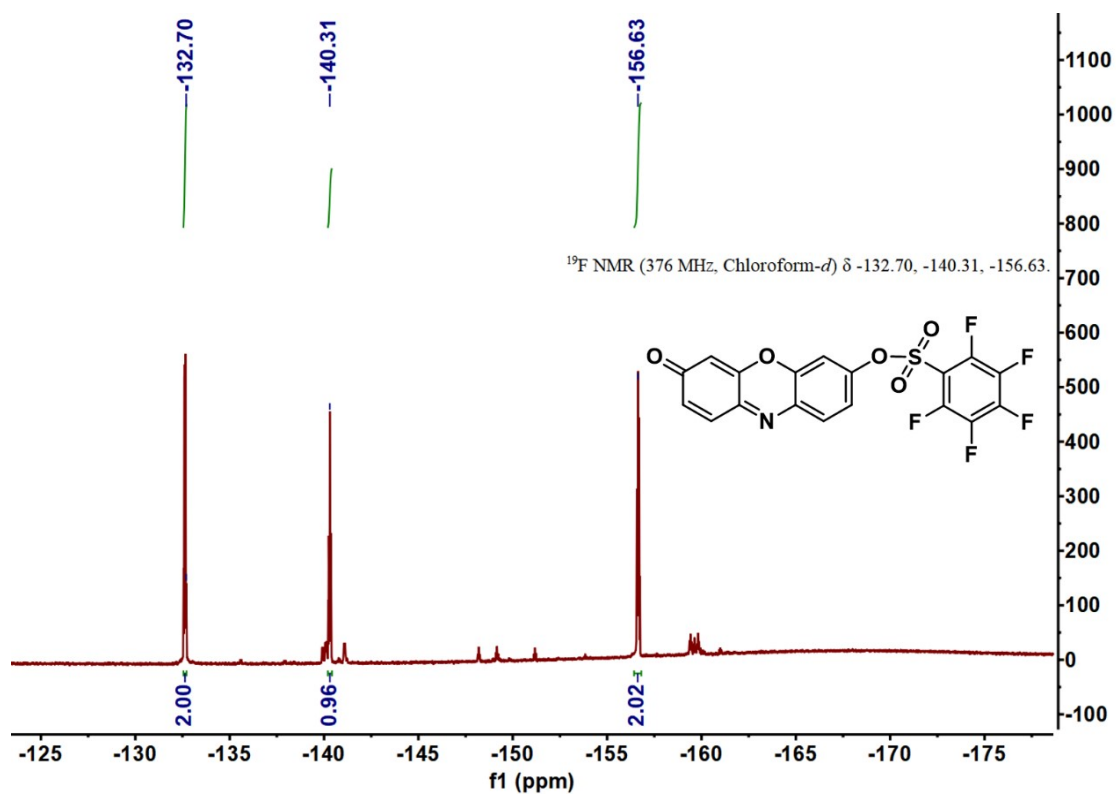

**Fig. S1** (1) Re, (2) Pentafluorobenzenesulfonyl chloride, (3) Re-FS probe. Photographs of the TLC plate will be provided under two environments: the product natural light (a) and 365 nm ultraviolet light (b) to clearly demonstrate the results under different observation modes. <sup>1</sup>H NMR, <sup>13</sup>C NMR and <sup>19</sup>F NMR.

## 4. Mass spectra of Re-FS.

Monoisotopic Mass, Even Electron Ions

135 formula(e) evaluated with 1 results within limits (up to 50 closest results for each mass)

Elements Used:

C: 0-18 H: 0-7 N: 0-1 O: 0-5 F: 0-5 S: 0-1

20250806-12-4-Neg 86 (0.352)

1: TOF MS ES-

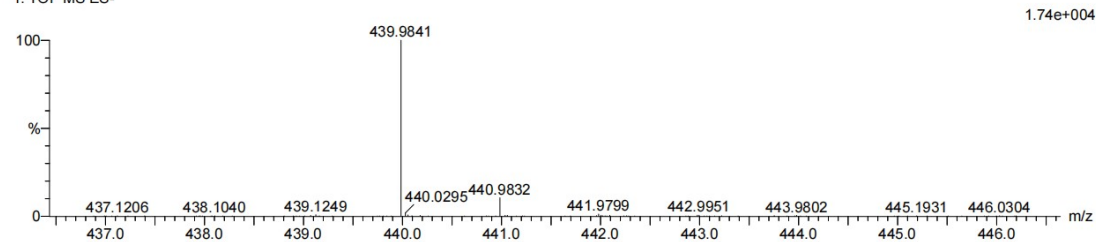

Minimum: -1.5

Maximum: 5.0 10.0 50.0

| Mass     | Calc. Mass | mDa  | PPM  | DBE  | i-FIT | Norm | Conf (%) | Formula          |
|----------|------------|------|------|------|-------|------|----------|------------------|
| 441.9799 | 441.9809   | -1.0 | -2.3 | 14.5 | 175.8 | n/a  | n/a      | C18 H5 N 05 F5 S |

**Fig. S2** HRMS (ESI-) m/z:  $[M-2H]^{2-}$  calculated for  $C_{18}H_5NO_5F_5S$ : 440.9799, found: 440.9832.

## 5. Mass spectra of Re-FS with $H_2O_2$ .

Monoisotopic Mass, Even Electron Ions

5 formula(e) evaluated with 1 results within limits (up to 50 closest results for each mass)

Elements Used:

C: 0-12 H: 0-8 N: 0-1 O: 0-3

20250806-12-1-Neg 68 (0.284)

1: TOF MS ES-

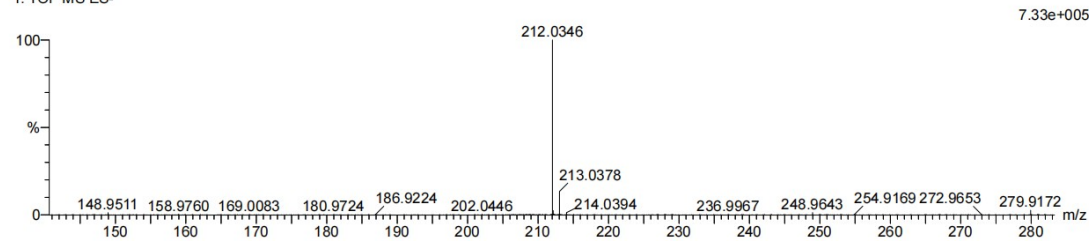

Minimum: -1.5

Maximum: 5.0 10.0 50.0

| Mass     | Calc. Mass | mDa  | PPM  | DBE  | i-FIT | Norm | Conf (%) | Formula     |
|----------|------------|------|------|------|-------|------|----------|-------------|
| 212.0346 | 212.0348   | -0.2 | -0.9 | 10.5 | 473.3 | n/a  | n/a      | C12 H6 N 03 |

**Fig. S3** HRMS (ESI-) m/z:  $[M-H]^-$  calculated for  $C_{12}H_6NO_3$ : 212.0346, found: 212.0348.

## 6. HPLC.

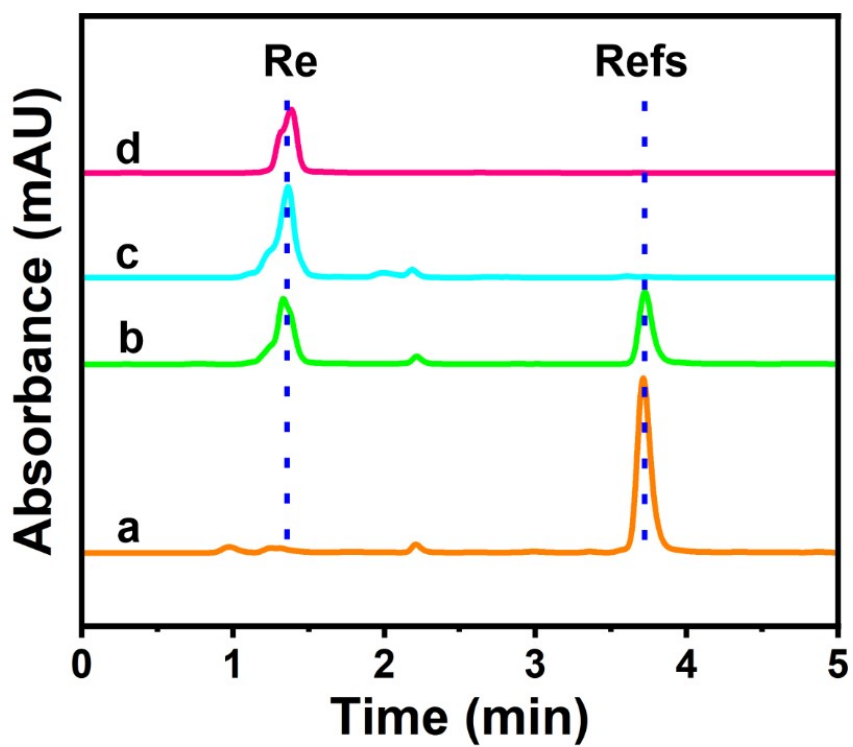

**Fig. S4** HPLC analysis of (a) Re-FS, before the reaction; Re-FS reacted with 1 mM  $\text{H}_2\text{O}_2$ , (b) during the reaction, (c) react completely; (d) free resorufin (Re)

7. FTIR.

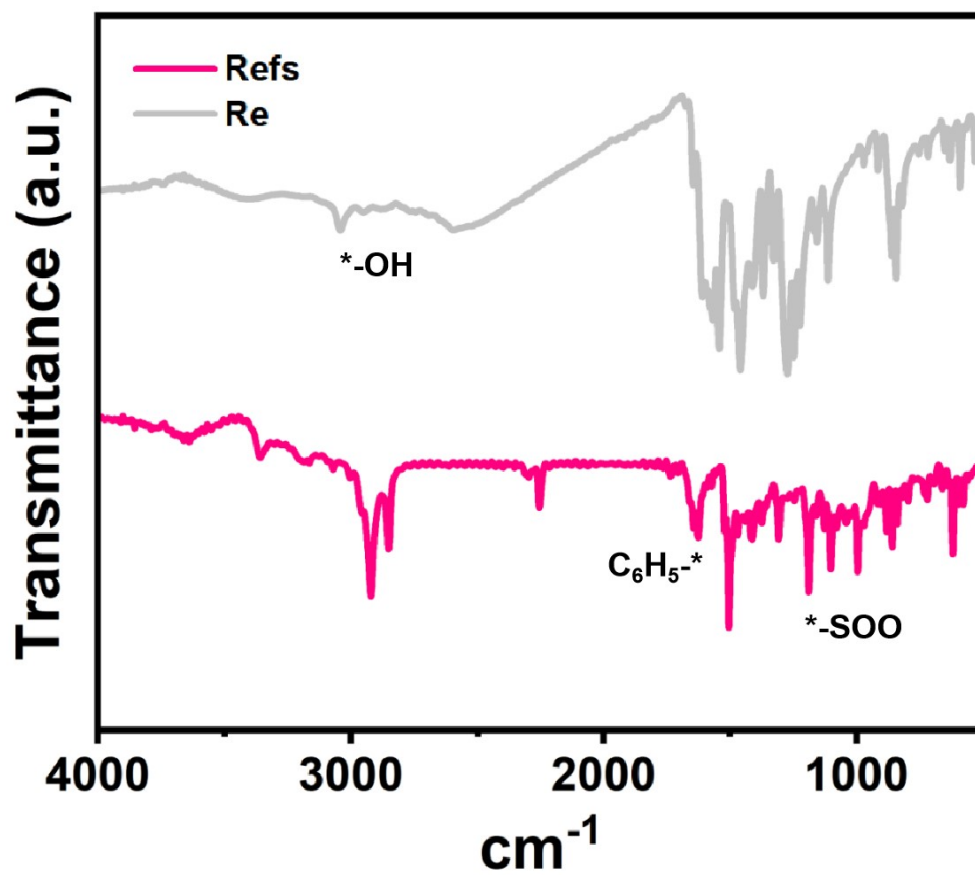

Fig. S5 FT-IR spectra of Re and Re-FS.

8. Reaction temperature.

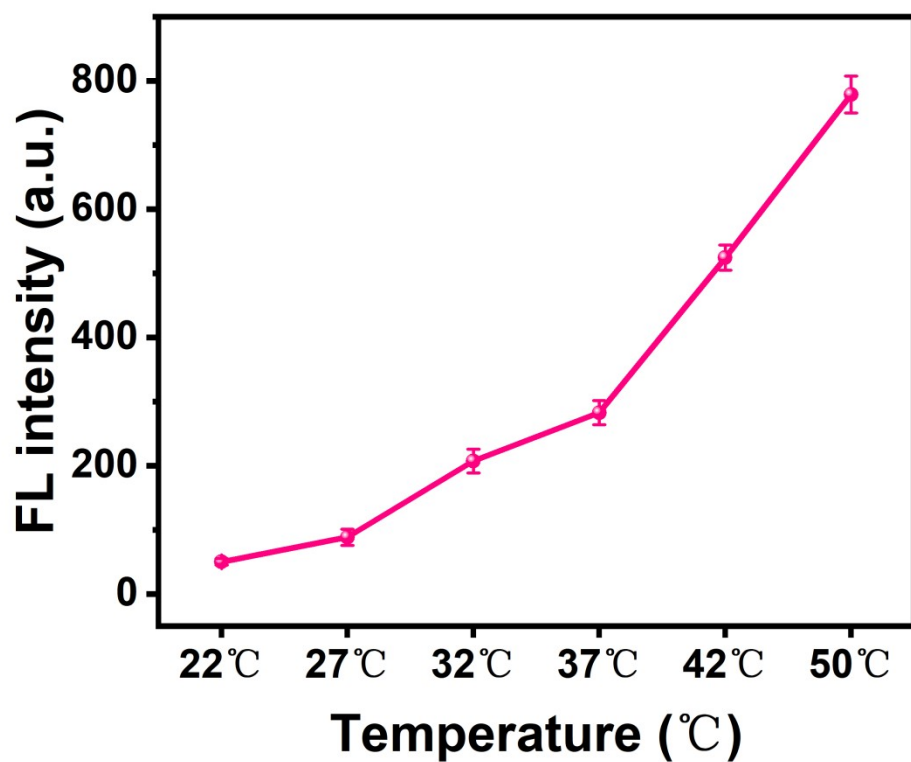

Fig. S6 Reaction temperature.

## 9. Selectivity and competition tests.

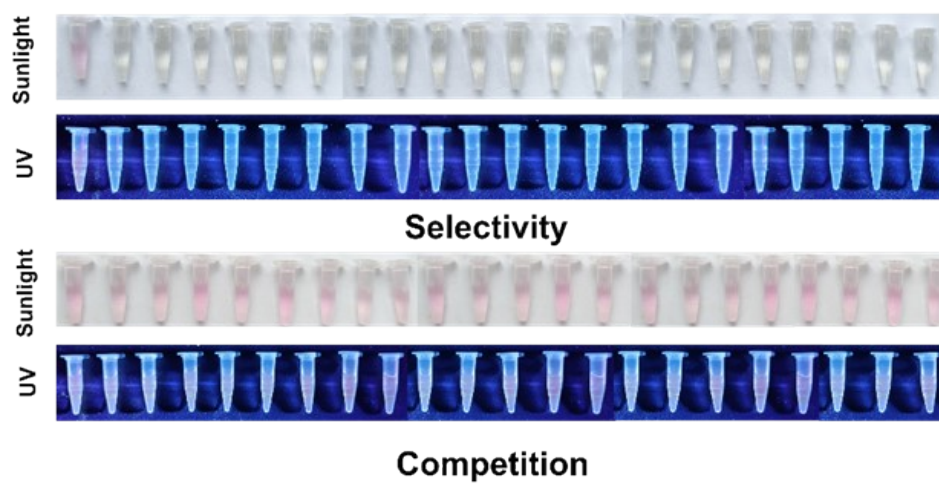

**Fig. S7** Corresponding photographs in sunlight and 365 nm UV light obtained under sunlight and 365 nm UV light respectively.

## 10. Cell experiments

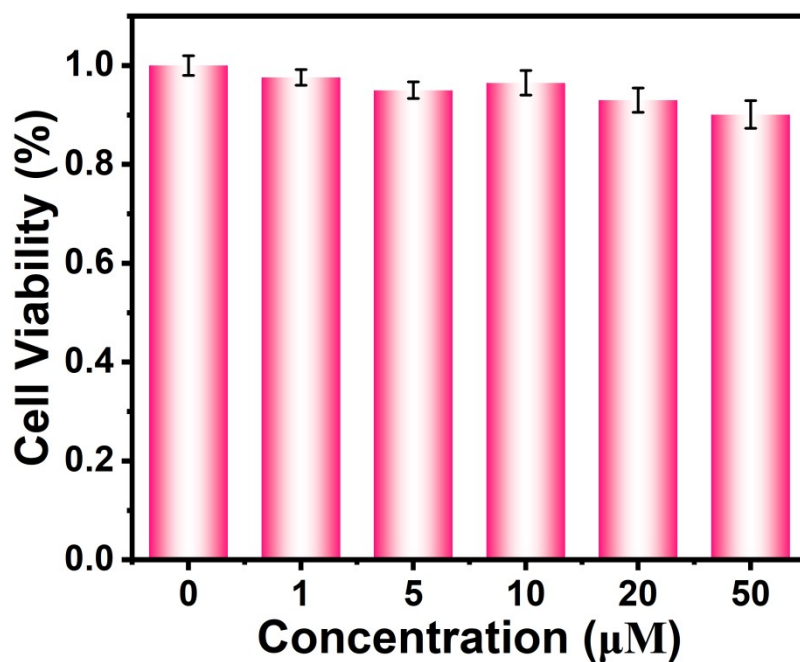

**Fig. S8** CCK-8 assay for estimating cell viability (%) of HeLa cells treated with various concentrations of Re-FS (0-50  $\mu\text{M}$ ). Data are shown as mean  $\pm$  s.d.,  $n = 3$ .

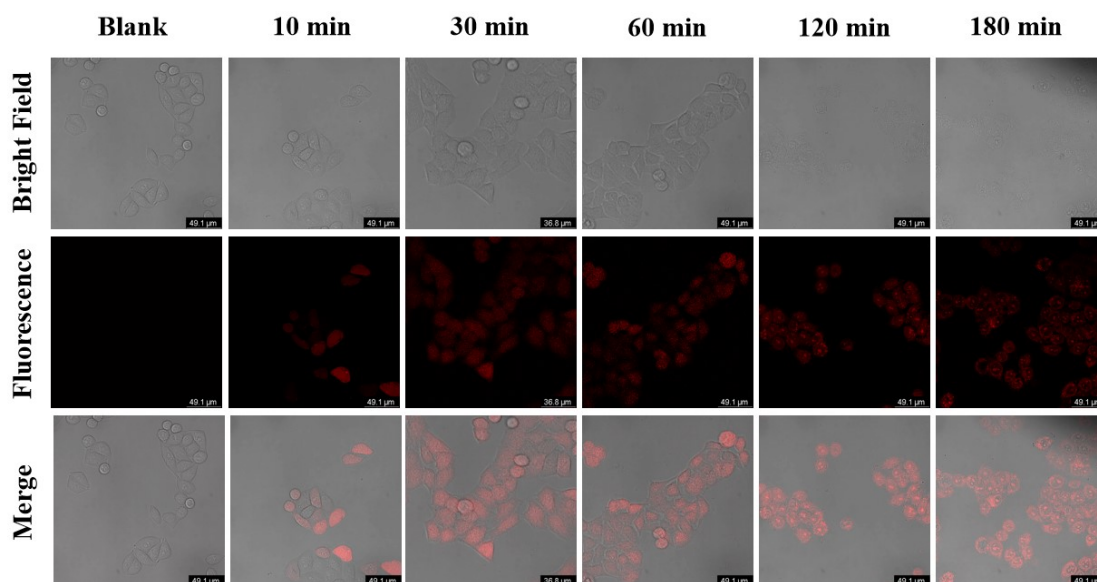

**Fig. S9** Fluorescence images of HeLa cells treated with Re-FS (10  $\mu\text{M}$ ) at different time (10-180 min).

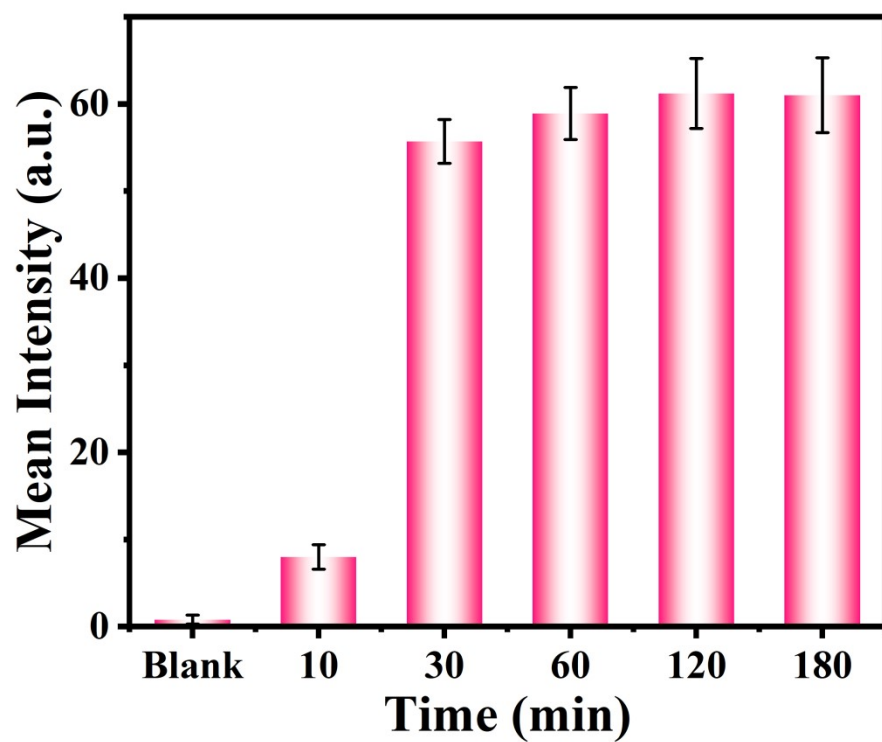

**Fig. S10** Quantification of fluorescence intensity of images in Fig. S9

**Table S1. Comparison of different H<sub>2</sub>O<sub>2</sub> sensing systems.**

| Sensing methods            | Materials/probe              | Detection limit | Linear range                                       | Reference |
|----------------------------|------------------------------|-----------------|----------------------------------------------------|-----------|
| Electrochemistry           | Fe@G-MWCNT                   | 28.2 $\mu$ M    | 0.1 – 7 mM                                         | 1         |
| Electrochemistry           | Hastelloy G35                | 13.5 mM         | 1 – 1000 mM                                        | 2         |
| Electrochemistry           | AgNp@GNR                     | 20 $\mu$ M      | 0.05 – 5 mM                                        | 3         |
| Electrochemistry           | Cat-HMFs/GCE                 | 50 $\mu$ M      | 0.1 – 10 mM                                        | 4         |
| Electrochemistry           | AuNPs-NH <sub>2</sub> /Cu-   | 1.2 $\mu$ M     | 5 – 850 $\mu$ M                                    | 5         |
| Electrochemistry           | PtNP / rGO-CNT / PtNP / SPCE | 4.3 $\mu$ M     | 25 – 1000 $\mu$ M                                  | 6         |
| Electrochemistry           | ZnO /ITO                     | 14.8 $\mu$ M    | 0.0625 – 5 mM                                      | 7         |
| Electrochemistry           | Cu-PAM                       | 16.7 $\mu$ M    | 0.05 – 25.31 mM                                    | 8         |
| fluorescence               | BOD-COOH                     | 4.41 $\mu$ M    | 25 – 125 $\mu$ M                                   | 9         |
| fluorescence               | AuNPs/His-AuNCs              | 3.6 $\mu$ M     | 5 – 135 $\mu$ M                                    | 10        |
| Fluorescence / Colorimetry | FeCo-CD                      | 1.23 $\mu$ M    | FL: 200 – 600 $\mu$ M<br>UV-Vis:200 – 1500 $\mu$ M | 11        |
| Fluorescence / Colorimetry | XH-2                         | 10 $\mu$ M      | FL: 0 – 140 $\mu$ M<br>UV-Vis:0 – 140 $\mu$ M      | 12        |
| Fluorescence / Colorimetry | Re-FS                        | 5 $\mu$ M       | 0 – 1 mM                                           | This work |

**Table S2. Fluorescence, colorimetric, and RGB method linear fitting.**

| Detection method | Linear fitting equations       | Linear range | Detection limit  |
|------------------|--------------------------------|--------------|------------------|
| Fluorescence     | $y=17.25+468C$ , $R^2=0.997$   | 0 – 1 mM     | 5 $\mu\text{M}$  |
| UV-Vis           | $y=0.293+0.44C$ , $R^2=0.997$  | 0 – 1 mM     | 10 $\mu\text{M}$ |
| RGB              | $y=0.505+0.054C$ , $R^2=0.991$ | 0 – 1 mM     | 20 $\mu\text{M}$ |

**Table S3. Detection of  $\text{H}_2\text{O}_2$  in serum samples from normal human by Fluorescence (n=3)**

| Sample | Added (uM) | Fluorescence  |              |         | HPLC          |              |         |
|--------|------------|---------------|--------------|---------|---------------|--------------|---------|
|        |            | Detected (uM) | Recovery (%) | RSD (%) | Detected (uM) | Recovery (%) | RSD (%) |
| Serum  | 0          | 0             |              |         | 0.11          |              | 2.7     |
|        | 10.00      | 9.81          | 98.1         | 2.2     | 10.18         | 100.7        | 2.8     |
|        | 20.00      | 19.77         | 98.9         | 3.3     | 20.15         | 100.2        | 2.2     |
|        | 30.00      | 30.52         | 101.7        | 3.0     | 31.15         | 103.5        | 2.2     |

**Table S4. Detection of H<sub>2</sub>O<sub>2</sub> in serum samples from normal human by UV-Vis (n=3)**

| Sample | Added (uM) | UV-Vis        |              |         | HPLC          |              |         |
|--------|------------|---------------|--------------|---------|---------------|--------------|---------|
|        |            | Detected (uM) | Recovery (%) | RSD (%) | Detected (uM) | Recovery (%) | RSD (%) |
| Serum  | 0          | 0             |              |         | 0.11          |              | 2.7     |
|        | 10.00      | 9.86          | 98.6         | 2.9     | 10.18         | 100.7        | 2.8     |
|        | 20.00      | 20.88         | 104.4        | 3.2     | 20.15         | 100.2        | 2.2     |
|        | 30.00      | 28.92         | 96.4         | 2.7     | 31.15         | 103.5        | 2.2     |

**Table S5. Detection of H<sub>2</sub>O<sub>2</sub> in human serum by smartphone-based RGB extraction method (n=3)**

| Sample | Added | Smartphone sensing |              |         | HPLC          |              |         |
|--------|-------|--------------------|--------------|---------|---------------|--------------|---------|
|        | (uM)  | Detected (uM)      | Recovery (%) | RSD (%) | Detected (uM) | Recovery (%) | RSD (%) |
| Serum  | 0     | 0                  |              |         | 0.11          |              | 2.7     |
|        | 20.00 | 18.96              | 94.8         | 2.9     | 20.15         | 100.2        | 2.2     |
|        | 30.00 | 28.33              | 94.4         | 3.2     | 31.15         | 103.5        | 2.2     |
|        | 40.00 | 43.02              | 107.6        | 2.7     | 39.89         | 99.5         | 2.4     |

## References

- 1 D. Soto, M. Alzate, J. Gallego and J. Orozco, *J. Electroanal. Chem.*, 2021, **880**, 114826.
- 2 A.a.M.A. Alboull, H. Liu, F. Abbas, A. Hussain, J. Jiang, B. Lou and G. Xu, *Langmuir*, 2025, **41**, 2065-2070.
- 3 V. Stanković, S. Đurđić, M. Ognjanović, J. Mutić, K. Kalcher and D.M. Stanković, *J. Electroanal. Chem.*, 2020, **876**, 114487.
- 4 M. Zhang, M. Chen, Y. Liu, Y. Wang and J. Tang, *Mater. Lett.*, 2019, **243**, 9-12.
- 5 W. Dang, Y. Sun, H. Jiao, L. Xu and M. Lin, *J. Electroanal. Chem.*, 2020, **856**, 113592.
- 6 S. Lee, Y.J. Lee, J.H. Kim and G.-J. Lee, *Chemosensors*, 2020, **8**, 63.
- 7 N. Ait Ahmed, K. Hebbache, A. Lahreche, S. Kerakra, K. Nasri, N. Aliouane, C. Chassigneux and M. Eyraud, *J Water Process Eng*, 2025, **78**, 108748.
- 8 L. Su, Y. Li, H. Chen, X. Liu, Z. Zhang, D. Bin, B. Yang, L. Sun, H. Lu and B. Liu, *Talanta*, 2025, **287**, 127689.
- 9 Y. Wang, Y. Liu, B. Liu, Y. Yuan, L. Wei, M. Wang and Z. Chen, *Molecules*, 2024, **29**, 229.
- 10 H. Pezhhan, M. Akhond and M. Shamsipur, *J. Lumin.*, 2020, **228**, 117604.
- 11 S. Wu, Z. Yu, J. Zhao, Y. Wang, J. Nan, L. Xu, X. Li, L. Yang and S. Dong, *Anal. Chem.*, 2025, 97, 15320-15328.
- 12 L. Xu, Y. Zhang, L. Zhao, H. Han, S. Zhang, Y. Huang, X. Wang, D. Song, P. Ma, P. Ren and Y. Sun, *Talanta*, 2021, 233, 122578.
